# Supplementary material for: Mutual Effects of Single and Combined CFTR Modulators and Bacterial Infection in Cystic Fibrosis
Source: PubMed Central journal article supplement (PMC9927584; doi:10.1128/spectrum.04083-22), 2023-01-10
Supplement: spectrum.04083-22-s0001.pdf [file spectrum.04083-22-s0001.pdf]

**Mutual effects of single and combined CFTR modulators and bacterial infection in cystic fibrosis**

**Supplementary information**

## 1 **Supplementary Methods**

2 **Minimum inhibitory concentration (MIC) measurement.** An aliquot of *P. aeruginosa* or *S. aureus*  
3 strains from glycerol stocks was streaked for isolation on tryptic soy agar (TSA) and incubated at  
4 37°C overnight (O/N). Bacterial glycerol stocks were not used more than three times to avoid  
5 variability in the experiments. One colony was picked from the plate and used to inoculate 5 ml of  
6 tryptic soy broth (TSB) (BD, Becton and Dickinson) and placed in a shaking incubator at 37°C 200  
7 rpm O/N. The O/N bacterial suspension was diluted to 0.1 OD/ml in 20 ml of TSB / flask and grown  
8 at 37°C at 200rpm up to reach the log phase (1). The bacteria were pelleted by centrifugation (2700  
9 g, 15 min, 4°C) and resuspended in cation-adjusted Mueller-Hinton broth (MH-II broth). MICs of  
10 CFTR modulators were determined using the broth microdilution susceptibility testing method,  
11 following the Clinical and Laboratory Standards Institute guidelines (2, 3). CFTR modulators were  
12 prepared using stock solutions in dimethyl sulfoxide (DMSO), and then tested in two-fold serial  
13 diluted fashion in MH-II broth. MIC testing was run in sterile 96-well Microtiter plates. The MIC was  
14 defined as the lowest compound concentration showing a reduction in the optical density at 620 nm  
15 of approximately 90% (MIC<sub>90</sub>) in comparison to the optical density of the bacteria grown with the  
16 vehicle after 20 hrs.

17 **Checkerboard assay.** The synergistic activities of CFTR modulators combined with antibiotics were  
18 determined by the checkerboard method in MH-II broth (4). Stock solutions of CFTR modulators  
19 were prepared in DMSO, while those of antibiotics in sterile H<sub>2</sub>O or DMSO, according to their  
20 solubility. Serial dilutions of CFTR modulators and antibiotics were prepared based on the MIC value  
21 of each drug. Then, a combination of different dilutions of each drug was prepared in 96-well  
22 microtiter plates in a checkerboard formation and the bacterial strain was added. After 20 hrs  
23 incubation at 37°C, bacterial growth was measured at the optical density of 620nm. Combinations  
24 showing a decrease in the MIC of 90% in comparison to the MICs of the antibiotic and CFTR  
25 modulator alone were recorded.. The fractional inhibitory concentration (FIC) index was calculated  
26 as MIC<sub>90</sub> of CFTR modulator in combination/ MIC<sub>90</sub> CFTR alone + MIC<sub>90</sub> antibiotic in combination/  
27 MIC<sub>90</sub> antibiotic alone (5). If no endpoint MIC value could be determined because of resistance to  
28 compound or solubility limits, the next highest MIC value was chosen for the FIC calculation (i.e., if  
29 the MIC>32, an MIC=64 was selected for the calculation) (6). The interaction between drugs was  
30 interpreted as synergistic (FIC index <0.5), additive (FIC index  $\geq$ 0.50 and <1.0), indifferent (FIC index  
31  $\geq$ 1.0 and  $\leq$ 4) and antagonistic (FIC index >4) (5).

32 **Bacteria preparation for acute infection.** An aliquot of *P. aeruginosa* PAO1 reference strain from  
33 glycerol stocks was streaked for isolation on TSA and incubated at 37°C O/N. One colony was picked  
34 from the plate and used to inoculate 5 ml of TSB and placed in a shaking incubator at 37°C 200 rpm  
35 O/N. The O/N bacterial suspension was diluted to 0.1 OD/ml in 20 ml of TSB / flask and grown for 3

36 hrs at 37°C at 200rpm, to reach the log phase (1). The bacteria were pelleted by centrifugation (2.700  
37 g, 15 min, 4°C), resuspended in sterile phosphate-buffered saline (PBS) and diluted to give 1x10<sup>6</sup>  
38 colony forming units (CFUs) / mouse in 60 µl.

39 **Mouse models.** C57BL/6NCrIBR male mice (8-10 weeks of age) were purchased from Charles  
40 River (Calco, Italy), shipped in protective, filtered containers, transported in climate-controlled trucks,  
41 and allowed to acclimatize for at least two days in the stabulary prior to use. Mice were maintained  
42 in sterile ventilated cages in the biosafety level 3 (BSL3) facility at San Raffaele Scientific Institute  
43 (Milano, Italia) where 3-5 mice per cage were housed. Mice were fed with standard rodent autoclaved  
44 chow (VRFI, Special Diets Services, UK) and autoclaved tap water. Fluorescent lights were cycled  
45 12hrs on, 12hrs off, and ambient temperature (23±1°C) and relative humidity (40-60%) were  
46 regulated. For PK experiments, animals were separated into two groups, with IVA levels analyzed  
47 in a model of acute *P. aeruginosa* lung infection or in uninfected mice. For infection experiments,  
48 mice were anesthetized by an intraperitoneal injection of a solution of Avertin (2,2,2- tribromethanol,  
49 97%) in 0.9% NaCl and administered at a volume of 0.015 ml/g body weight. Mice were placed in  
50 supine position. The trachea was directly visualised by ventral midline, exposed and intubated with  
51 a sterile, flexible 22-g cannula attached to a 1 ml syringe. An inoculum of 60 µl of planktonic bacterial  
52 cells was implanted via the cannula into the lung. After inoculation, all incisions were closed by  
53 suture. IVA was administered once, half an hour after the challenge, by intraperitoneal (i.p.) injection  
54 at a dose of 3 mg/kg using as vehicle 10% PEG 400, 10% Tween 80, 80% saline. IVA dose used in  
55 this model was calculated based on a single adult dose (150 mg) adjusted for mouse weight,  
56 assuming that an adult with CF weighs 50 kg [28]. Another group of infected mice were treated with  
57 the vehicle. Mice were euthanized with an overdose of carbon dioxide and the diaphragm opened.  
58 Blood was collected in 0.5-ml K3-EDTA tubes through cardiac puncture. Time points for sampling  
59 were before t = 0.1667, 1, 2, 6, and 24 hrs after administration. Blood samples were directly placed  
60 on ice and centrifuged soon after in a precooled centrifuge, and plasma samples were stored at  
61 -80°C until IVA plasma concentrations were determined. One sample was taken per mouse, and  
62 every time point was sampled in triplicate for uninfected mice (3 mice) and quadruplicate for infected  
63 ones (4 mice). Bronchoalveolar lavage (BAL) was performed immediately after blood collection. The  
64 concentrations in ELF were determined by taking BAL fluid samples and a concomitant plasma  
65 sample, as previously described [37]. In short, murine trachea was exposed by a 1-cm incision on  
66 the ventral neck skin for insertion of the cannula. Lungs were instilled two times with 0.9 ml of sterile  
67 saline, and the fluid was aspirated immediately. The aspirates recovered from each mouse were  
68 pooled and directly placed on ice, then centrifuged in a precooled centrifuge and the supernatant  
69 subsequently stored at -80°C. Lungs were excised aseptically, weighed and homogenized in 2 ml  
70 of saline using the homogenizer gentleMACS™ Octo Dissociator, and then stored at -80°C. One-

71 hundred  $\mu$ l of the lung homogenates and BAL fluids and 10-fold serial dilutions were spotted onto  
72 TSA. CFUs were determined after overnight growth at 37°C.

73 **Protein binding and concentration determinations in plasma, lung and ELF.** Protein binding  
74 was measured in mouse plasma and lung homogenate by Rapid Equilibrium Dialysis (RED). Stock  
75 solutions of ivacaftor (IVA) and its main metabolite M1 were prepared in MeOH whereas M6 was  
76 prepared in DMSO at a concentration of 1 mg/ml. Working solutions (WSs) were prepared by adding  
77 10 $\mu$ l of each stock solution to 90 $\mu$ l of DMSO to have a concentration of 0.1 mg/ml. The standard  
78 Diclofenac, used as control as highly binding standard (7), was prepared in DMSO (1 mM). 5  $\mu$ l of  
79 WSs were diluted in 495  $\mu$ l plasma or lung homogenate to have a final compound incubation  
80 concentrations of 1000 ng/ml and 10  $\mu$ M for Diclofenac. The concentration of 1000 ng/ml was chosen  
81 because similar to IVA  $C_{max}$  *in vivo*. Spiked samples (200  $\mu$ l) were dialyzed in the Rapid Equilibrium  
82 Dialysis (RED) inserts (Thermo Scientific) against 350  $\mu$ L of PBS buffer in the RED plate for 4 hrs at  
83 37°C, under agitation (300 rpm orbital shaker). Samples were tested in duplicate. At the beginning  
84 and the end of the incubation, 50  $\mu$ l of sample in the donor were added to 50  $\mu$ l of PBS buffer whereas  
85 50 $\mu$ l of the blank matrix were added to 50  $\mu$ l of dialyzed PBS buffer. Samples were then mixed with  
86 200  $\mu$ l of acetonitrile containing the internal standard (Lidocaine 10 ng/ml for IVA and metabolites,  
87 and Verapamil 10 ng/ml for Diclofenac). Samples were centrifuged at 3500g for 5 minutes. Then,  
88 supernatants were transferred into vials for ultra-performance liquid chromatography-tandem mass  
89 spectrometry (UPLC-MS/MS) analysis.  $T_0$  was used to check potential instability in the matrix. 5  $\mu$ l  
90 supernatant was injected on a Waters Acquity Premiere Ultrahigh-Performance Liquid  
91 Chromatography (UPLC) system equipped with a Kinetex C8 (2,6 $\mu$ m particle size, 100A 50\*2.1mm  
92 Phenomenex) column at 35 °C, running at a flow rate of 300  $\mu$ l/min and interfaced with an AB Sciex  
93 API 3200 mass spectrometer with a TurbolonSpray source (positive mode) and the Analyst (version  
94 1.6.3) software. The chromatographic gradient was in 0.1% formic acid in water or acetonitrile, going  
95 from a 2% organic phase at 2 min to 98% at 2.5min. Isocratic condition at 98% was kept up to 4 min  
96 and the system was reconditioned from 4.5 to 6 min at 2%B. Mass spectrometer was run in Positive  
97 mode with a capillary Temperature 450 C, CUR 30, Gas 1 25 and Gas 2 45, IS was at 5500V.  
98 Quantitation was performed in Multiple reaction Monitoring (MRM) using the transitions reported in  
99 **Supplementary Table S6**. Protein binding was calculated as follows:

100  $\% \text{ Fb (fraction bound)} = [(\text{area donor} - \text{area acceptor}) / \text{area donor}] * 100$

101 Free fraction= 100- %Fb.

102 Concentrations of IVA and its metabolites in ELF were determined by using the ratio of the urea  
103 concentration in BALF to that in plasma (8). Urea content was measured with a colorimetric Sigma  
104 Aldrich MAK006 Kit. Absorbance was measured at 570 nm (A570) on a Tecan Sunrise  
105 spectrophotometer. Urea concentrations are normally the same in plasma and ELF because of the  
106 equilibrium across the capillary-alveolar membrane. Thus, the apparent ELF volume was estimated

107 by using urea as an endogenous marker of ELF dilution and was calculated as follows: drug  
108 concentration in ELF = drug concentration in BALF × urea concentration in plasma/urea  
109 concentration in BALF. Reference urea standards ranged from 20 to 100 nmol/ml and were linear  
110 over the concentration range.

111 **Samples preparation.** Lung homogenates were prepared by homogenizing the whole tissue in 2 ml  
112 of ammonium acetate buffer 20mM. An intermediate 50 µg/ml stock solution of all the three analytes  
113 was prepared from the stock solutions 1 mg/ml. WSs of the three compounds, with concentrations  
114 ranging from 5 to 10000 ng/ml, were prepared by sequential dilution of intermediate stock solution  
115 in MeOH. Calibration curves in plasma and lung homogenate and BALF were prepared by spiking 5  
116 µl of WSs into 45 µl of plasma, blank lung homogenate or blank BALF. QC samples were analogously  
117 prepared at concentrations of 10, 50 and 500 ng/ml in the three matrices. Calibrants, QC samples  
118 and samples (50 µl of matrices) were added to a 96 wells plate Phree Phospholipid Removal  
119 Solutions (Phenomenex) with 200 ul of acetonitrile containing Lidocaine as internal standard (10  
120 ng/ml) and 0.1 % of formic acid. The plate was shaken for 5 min on a 500g orbital shaker and  
121 centrifuged for 15 min at 5°C with a collection plate. The eluates were transferred in a 96-well plate  
122 for autosampler and analyzed. Calibration ranges were the following ones: for IVA 0.5-750 ng/ml in  
123 plasma and BALF and 4-1000 ng/g in the lung homogenate; for M1 0.5-1000 in plasma, 0.5-500ng/ml  
124 in BALF and 3.4-1000 ng/g in the lung homogenate; for M6 0.5-500ng/ml in plasma and BALF, and  
125 3.4-2000ng/g in the lung homogenate. Concentration values reported as unquantifiable were  
126 excluded from the evaluation.

127

## Supplementary Tables

**Supplementary Table S1. Phenotypic traits and antibiotics susceptibility of clinical *P. aeruginosa* isolates tested in this study.** *P. aeruginosa* early isolates, collected from CF patients at the early stage of chronic colonization, and their pathoadaptive variants, collected after years of persistence, in the advanced stage of chronic colonization (late), were previously characterized for their clonality (all isolates collected from a single patient are clonal), phenotypic traits and susceptibility to antibiotics (3, 9, 10).

| Patient | Isolate / type | Yrs ( $\Delta$ ) | Mucoidy<br>$\mu\text{g}$ uronic acid/<br>$\mu\text{g}$ protein | Motility                       |                               | Protease<br>( $\emptyset$ cm) | Pyocyanin<br>( $\text{OD}_{695}$<br>26h) | Susceptibility to antibiotics |     |     |     |
|---------|----------------|------------------|----------------------------------------------------------------|--------------------------------|-------------------------------|-------------------------------|------------------------------------------|-------------------------------|-----|-----|-----|
|         |                |                  |                                                                | Twitching<br>( $\emptyset$ cm) | Swimming<br>( $\emptyset$ cm) |                               |                                          | COL                           | CIP | MER | TOB |
| AA      | 2 / early      |                  | -                                                              | 1.8                            | 5.8                           | 1.8                           | 0.05                                     | -                             | -   | -   | -   |
|         | 43 / late      | 7.5              | 1.00                                                           | 1.1                            | -                             | 1.0                           | 0.02                                     | -                             | -   | -   | -   |
|         | 44 / late      | 7.5              | -                                                              | 1.3                            | -                             | 1.1                           | 0.05                                     | -                             | -   | -   | -   |
| MF      | 1 / early      |                  | -                                                              | 2.6                            | 1.6                           | 1.7                           | 0.05                                     | -                             | -   | -   | -   |
|         | 51 / late      | 10.1             | -                                                              | -                              | -                             | -                             | 0.08                                     | -                             | R   | R   | -   |
| KK      | 1 / early      |                  | -                                                              | 1.4                            | 1.2                           | -                             | 0.02                                     | -                             | -   | -   | -   |
|         | 2 / early      |                  | -                                                              | -                              | -                             | -                             | 0.01                                     | -                             | -   | -   | -   |
|         | 71 / late      | 12.6             | -                                                              | -                              | -                             | -                             | 0.01                                     | -                             | R   | R   | -   |
|         | 72 / late      | 12.6             | -                                                              | -                              | -                             | -                             | 0.01                                     | -                             | R   | R   | -   |
| RP      | 73 / late      | 8.5              | -                                                              | -                              | -                             | -                             | 0.05                                     |                               |     | R   |     |

Yrs ( $\Delta$ ): years between early and late in clonal sequential isolates; \* Indicates swimming and twitching motility zone diameter. R: antibiotic resistance. COL: colistin, CIP: ciprofloxacin, MER: meropenem, TOB: tobramycin

**Supplementary Table S2: Phenotypic traits of clinical *S. aureus* isolates tested in this study.** *S. aureus* early isolates, collected from CF patients at the early stage of chronic colonization, and their pathoadaptive variants, collected after years of persistence, in the advanced stage of chronic colonization (late), were previously characterized for their clonality (all isolates collected from a single patient are clonal) and phenotypic traits (11).

| Patient | Isolate name | Isolate type | Yrs ( $\Delta$ ) | Colony size | CP  | $\beta$ -HL |
|---------|--------------|--------------|------------------|-------------|-----|-------------|
| 20      | A10          | early        |                  | n           | +++ |             |
|         | A12          | late         | 13               | i           | ++  |             |
| 22      | J6           | early        |                  | n           |     |             |
|         | J9           | late         | 13.5             | i           |     |             |
| 25      | F1           | early        |                  | n           | +   | +           |
|         | F5           | late         | 13               | n           |     |             |

Yrs ( $\Delta$ ): years between early and late in clonal sequential isolates; n: normally-sized colonies, i: intermediate-sized colonies; CP: capsule polysaccharide production,  $\beta$ -HL: presence of  $\beta$ -haemolysin activity.

**Supplementary Table S3. Minimum inhibitory concentrations (MIC<sub>90</sub>) of ivacaftor (IVA), lumacaftor (LUM), tezacaftor (TEZ), elexacaftor (ELX) and the triple combination elexacaftor/tezacaftor/ivacaftor (ELX/TEZ/IVA) against *P. aeruginosa* isolates collected from CF patients at different stages of colonization (early and late).** *P. aeruginosa* isolates were grown for 20 hours in the presence of serial dilutions of IVA, LUM, TEZ, ELX and the triple combination ELX/TEZ/IVA. The concentrations tested ranged from 0.25  $\mu$ g/ml to 32  $\mu$ g/ml for IVA, LUM, TEZ and ELX, and from ELX 0.5  $\mu$ g/ml / TEZ 0.25  $\mu$ g/ml / IVA 0.375  $\mu$ g/ml to ELX 64  $\mu$ g/ml / TEZ 32  $\mu$ g/ml / IVA 48  $\mu$ g/ml for the triple combination. The MIC<sub>90</sub> was defined as the lowest compound concentration showing a reduction in the optical density at 620 nm of approximately 90% in comparison to the optical density of the bacteria grown with the vehicle after 20 hrs. Each experiment was performed at least two independent times (two technical replicates).

|                                    |                       | <i>P. aeruginosa</i> isolates |                       |                       |                       |                       |                       |                       |                       |                       |                       |                       |
|------------------------------------|-----------------------|-------------------------------|-----------------------|-----------------------|-----------------------|-----------------------|-----------------------|-----------------------|-----------------------|-----------------------|-----------------------|-----------------------|
| Isolate name                       |                       | PAO1                          | AA2                   | AA43                  | AA44                  | MF1                   | MF51                  | KK1                   | KK2                   | KK71                  | KK72                  | RP73                  |
| Isolate type                       |                       | ref                           | early                 | late                  | late                  | early                 | late                  | early                 | early                 | late                  | late                  | late                  |
| MIC <sub>90</sub><br>( $\mu$ g/ml) | IVA                   | >32                           | >32                   | >32                   | >32                   | >32                   | >32                   | >32                   | >32                   | >32                   | >32                   | >32                   |
|                                    | LUM                   | >32                           | >32                   | >32                   | >32                   | >32                   | >32                   | >32                   | >32                   | >32                   | >32                   | >32                   |
|                                    | TEZ                   | >32                           | >32                   | >32                   | >32                   | >32                   | >32                   | >32                   | >32                   | >32                   | >32                   | >32                   |
|                                    | ELX                   | >32                           | >32                   | >32                   | >32                   | >32                   | >32                   | >32                   | >32                   | >32                   | >32                   | >32                   |
|                                    | ELX /<br>TEZ /<br>IVA | >64 /<br>>32 /<br>>48         | >64 /<br>>32 /<br>>48 | >64 /<br>>32 /<br>>48 | >64 /<br>>32 /<br>>48 | >64 /<br>>32 /<br>>48 | >64 /<br>>32 /<br>>48 | >64 /<br>>32 /<br>>48 | >64 /<br>>32 /<br>>48 | >64 /<br>>32 /<br>>48 | >64 /<br>>32 /<br>>48 | >64 /<br>>32 /<br>>48 |

ref, reference strain; early, isolate collected at the early stage of chronic colonization; late, isolate collected after years of persistence, in the advanced stage of chronic colonization.

**Supplementary Table S4. Pharmacokinetic parameter estimates for M1 in plasma, epithelial lining fluid (ELF) and lungs of infected and non-infected mice.** C57BL/6NCrIBR male mice (8 to 10 weeks of age) were infected with  $1 \times 10^6$  colony forming units of *P. aeruginosa* PAO1 by intratracheal administration. A non-infected control group was also tested in parallel. After 30 min from the infection mice were treated with 3 mg/kg ivacaftor (IVA) in 10% PEG 400, 10% Tween 80, 80% saline by intraperitoneal administration. Mice were sacrificed at 10 min, 1, 2, 6 and 24 hrs after IVA administration. Blood was collected and processed to obtain plasma. Bronchoalveolar lavage fluid (BALF) was collected, centrifuged and the supernatant used to quantify IVA concentration. Lungs were excised, homogenized, centrifuged and the supernatants used to quantify IVA concentration. Plasma, lung homogenate and BALF (50 $\mu$ l) were added to a Phree Phospholipid Removal plate (Phenomenex) with acetonitrile and 0.1% formic acid in order to eliminate phospholipids, decreasing the matrix effect. Eluates were analyzed by UPLC-MS/MS method with a linear gradient in MRM positive mode. Calibration ranges were the following ones: M1 0.5-1000 in plasma, 0.5-500ng/ml in BALF and 3.4-1000 ng/g in the lung homogenate. Data are the geometric mean of values from 3-4 mice. Concentrations of M1 in ELF were determined using the ratio of the urea concentration in plasma to that in BALF. Concentration in ELF = drug concentration in BALF  $\times$  urea in plasma / urea in BALF. The data are the geometric means of values from 3-4 mice.

| Sample | Mice group   | Pharmacokinetic parameters |                             |                            |                            |                                       |                                      |                           |              |
|--------|--------------|----------------------------|-----------------------------|----------------------------|----------------------------|---------------------------------------|--------------------------------------|---------------------------|--------------|
|        |              | T <sub>max</sub><br>(hrs)  | C <sub>max</sub><br>(ng/ml) | T <sub>last</sub><br>(hrs) | C <sub>last</sub><br>(hrs) | AUC <sub>last</sub><br>(hrs<br>ng/ml) | AUC <sub>INF</sub><br>(hrs<br>ng/ml) | T <sub>1/2</sub><br>(hrs) | MRT<br>(hrs) |
| plasma | non-infected | 1                          | 111.6                       | 24                         | 2.0                        | 887.3                                 | 898.7                                | 4,0                       | 4.9          |
|        | infected     | 1                          | 82.6                        | 24                         | 1.6                        | 823.3                                 | 832.5                                | 4,0                       | 5.0          |
| ELF    | non-infected | 6                          | 10.8                        | 6                          | 10.8                       | 55.1                                  | nd                                   | nd                        | 3.3          |
|        | infected     | 1                          | 11.6                        | 6                          | 9.9                        | 59.9                                  | 406.6                                | 24.3                      | 3.1          |
| lung   | non-infected | 2                          | 7.0                         | 6                          | 6.4                        | 36.3                                  | nd                                   | nd                        | 3.2          |
|        | infected     | 6                          | 18.4                        | 6                          | 1.7                        | 239.8                                 | nd                                   | nd                        | 6.7          |

T<sub>max</sub>, time of maximum concentration; C<sub>max</sub>, maximum concentration; T<sub>last</sub>, time of last quantifiable concentration; C<sub>last</sub>, last quantifiable concentration; AUC<sub>last</sub>, AUC to the last quantifiable concentration level; AUC<sub>INF</sub>, AUC to infinity; T<sub>1/2</sub>, half-life; MRT, mean residence time; nd, not determined.



**Supplementary Table S5. Penetration of M1 in lung and epithelial lining fluid (ELF).** Plasma and lung concentrations were multiplied for the free fraction from the protein binding experiment (0.11% for plasma and 2.83% for lung; **Table 4**). ELF free fraction was calculated considering ELF protein binding equal to protein binding in the bronchoalveolar lavage fluid. Data are the geometric mean of values from 3-4 mice.

| Mice group   | Values by sample type        |                        |                              |                        |                             |                       | lung/plasma                   |                  | ELF/plasma                    |                  |
|--------------|------------------------------|------------------------|------------------------------|------------------------|-----------------------------|-----------------------|-------------------------------|------------------|-------------------------------|------------------|
|              | plasma                       |                        | lung                         |                        | ELF                         |                       | C <sub>max</sub> <sup>#</sup> | AUC <sup>#</sup> | C <sub>max</sub> <sup>#</sup> | AUC <sup>#</sup> |
|              | fC <sub>max</sub><br>(ng/ml) | fAUC<br>(hrs<br>ng/ml) | fC <sub>max</sub><br>(ng/ml) | fAUC<br>(hrs<br>ng/ml) | C <sub>max</sub><br>(ng/ml) | AUC<br>(hrs<br>ng/ml) |                               |                  |                               |                  |
| non-infected | 0.12                         | 0.97                   | 0.20                         | 0.93                   | 10.8                        | 49.0                  | 1.67                          | 0.96             | 90.0                          | 50.5             |
| infected     | 0.09                         | 1.10                   | 0.95                         | 1.57                   | 11.6                        | 52.0                  | 10.6                          | 1.43             | 129                           | 47.3             |

# Values for lung/plasma (ratio of lung free maximum concentration or exposure to plasma free maximum concentration or exposure) and ELF/plasma (ratio of ELF maximum concentration or exposure to plasma free maximum concentration or exposure); fC<sub>max</sub> and fAUC refer to unbound M1 in plasma and lung.

**Supplementary Table S6. Multiple Reaction Monitoring (MRM) transitions and conditions**

| Analyte      | Parent Ion<br>MH <sup>+</sup> (Da) | Product Ion<br>(Da) | Dwell Time<br>(msec) | Declustering<br>Potential<br>(Volts) | Collision<br>Energy(volts) |
|--------------|------------------------------------|---------------------|----------------------|--------------------------------------|----------------------------|
| IVA_1*       | 393.2                              | 172.2               | 100                  | 38                                   | 38                         |
| IVA_2        | 393.2                              | 319.2               | 100                  | 43                                   | 41                         |
| M1_1*        | 409.1                              | 172.3               | 100                  | 44                                   | 48                         |
| M1_2         | 409.1                              | 353.0               | 100                  | 44                                   | 23                         |
| M6_1*        | 423.1                              | 172.3               | 100                  | 45                                   | 41                         |
| M6_2         | 423.1                              | 367.2               | 100                  | 45                                   | 23.5                       |
| Lidocaine 1* | 235.3                              | 86.1                | 100                  | 49                                   | 26                         |
| Lidocaine 2  | 235.3                              | 58.1                | 100                  | 44                                   | 52                         |

\*MRM transitions used for quantitation

## Supplementary Figures

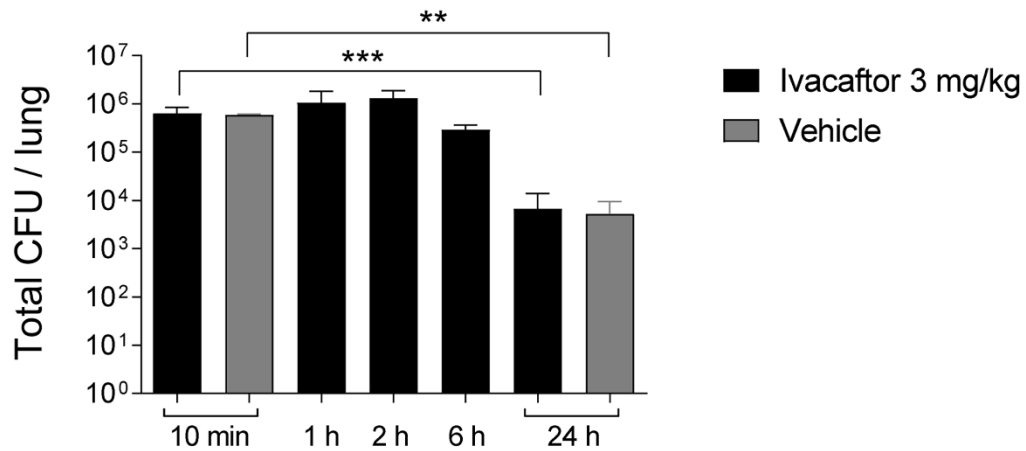

**Supplementary Figure S1. Ivacaftor (IVA) and M1 concentrations in murine lung.** C57BL/6NCrIBR male mice (8 to 10 weeks of age) were infected with  $1 \times 10^6$  colony forming units of *P. aeruginosa* PAO1 by intratracheal administration. After 30min from the infection mice were treated with 3 mg/kg IVA in the vehicle 10% PEG 400, 10% Tween 80, 80% saline or the vehicle by intraperitoneal administration. Mice were sacrificed at 10min, 1, 2, 6 and 24 hrs after IVA administration. After blood and bronchoalveolar lavage fluid collection, lungs were excised and homogenized. Both bronchoalveolar lavage fluids and lungs were plated on tryptic soy agar to determine the bacterial burden. Data are represented as mean values  $\pm$  standard errors of the means (SEMs). Statistical significance was calculated by two-way ANOVA with Bonferroni's multiple comparison test comparing mice treated with IVA and vehicle at 10 min and 24h. \*\*:  $p < 0.01$ ; \*\*\*:  $p < 0.001$ .

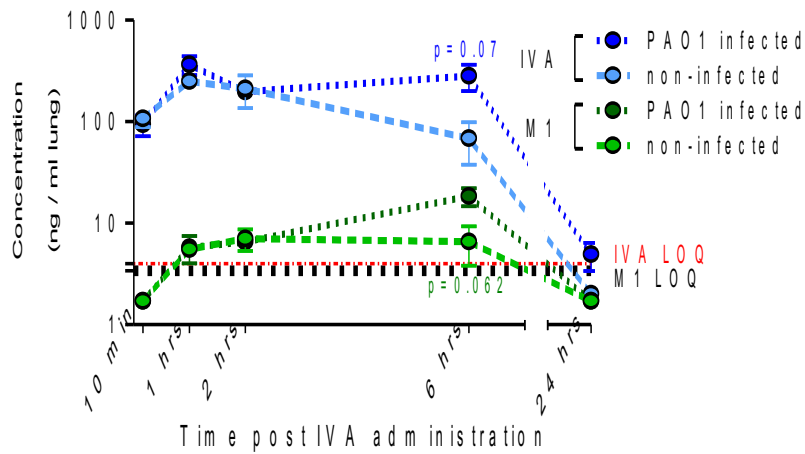

**Supplementary Figure S2. Ivacaftor (IVA) and M1 concentrations in murine lung.** C57BL/6NCrIBR male mice (8 to 10 weeks of age) were infected with  $1 \times 10^6$  colony forming units of *P. aeruginosa* PAO1 by intratracheal administration. An uninfected control group was also tested in parallel. After 30min from the infection mice were treated with 3 mg/kg IVA in 10% PEG 400, 10% Tween 80, 80% saline by intraperitoneal administration. Mice were sacrificed at 10min, 1, 2, 6 and 24 hrs after IVA administration. After blood and bronchoalveolar lavage fluid collection, lungs were excised, homogenized and the supernatants used to quantify IVA and M1 by high-performance liquid chromatography–tandem mass spectrometry. Data, derived from 3-4 mice, are represented as mean values  $\pm$  standard errors of the means (SEMs). Limits of quantification (LOQ) for IVA and M1 are indicated. A value corresponding to LOQ/2 was assigned to undetectable samples at specific time-points (10 min and 24 hrs). Statistical significance was calculated by Mann-Whitney test comparing infected and uninfected mice at each time-point.

## Bibliography

1. Cigana C, Ranucci S, Rossi A, De Fino I, Melessike M, Bragonzi A. 2020. Antibiotic efficacy varies based on the infection model and treatment regimen for *Pseudomonas aeruginosa*. *The European respiratory journal* 55.
2. CLSI. 2014. CLSI M100-S24. Performance standards for antimicrobial susceptibility testing; 24th informational supplement. . Clinical and Laboratory Standards Institute, Wayne, Pa.
3. Cigana C, Bernardini F, Facchini M, Alcalá-Franco B, Riva C, De Fino I, Rossi A, Ranucci S, Misson P, Chevalier E, Brodmann M, Schmitt M, Wach A, Dale GE, Obrecht D, Bragonzi A. 2016. Efficacy of the Novel Antibiotic POL7001 in Preclinical Models of *Pseudomonas aeruginosa* Pneumonia. *Antimicrobial agents and chemotherapy* 60:4991-5000.
4. Sousa MGC, Xavier PD, Cantuaria APC, Porcino RA, Almeida JA, Franco OL, Rezende TMB. 2021. Host defense peptide IDR-1002 associated with ciprofloxacin as a new antimicrobial and immunomodulatory strategy for dental pulp revascularization therapy. *Microbial pathogenesis* 152:104634.
5. Schneider EK, Azad MA, Han ML, Tony Zhou Q, Wang J, Huang JX, Cooper MA, Doi Y, Baker MA, Bergen PJ, Muller MT, Li J, Velkov T. 2016. An "Unlikely" Pair: The Antimicrobial Synergy of Polymyxin B in Combination with the Cystic Fibrosis Transmembrane Conductance Regulator Drugs KALYDECO and ORKAMBI. *ACS infectious diseases* 2:478-88.
6. Hussein MH, Schneider EK, Elliott AG, Han M, Reyes-Ortega F, Morris F, Blastovich MAT, Jasim R, Currie B, Mayo M, Baker M, Cooper MA, Li J, Velkov T. 2017. From Breast Cancer to Antimicrobial: Combating Extremely Resistant Gram-Negative "Superbugs" Using Novel Combinations of Polymyxin B with Selective Estrogen Receptor Modulators. *Microbial drug resistance* 23:640-650.
7. Chan KK, Vyas KH, Brandt KD. 1987. In vitro protein binding of diclofenac sodium in plasma and synovial fluid. *Journal of pharmaceutical sciences* 76:105-8.
8. Melchers MJ, Teague J, Warn P, Hansen J, Bernardini F, Wach A, Obrecht D, Dale GE, Mouton JW. 2019. Pharmacokinetics and Pharmacodynamics of Murepavadin in Neutropenic Mouse Models. *Antimicrobial agents and chemotherapy* 63.
9. Bianconi I, Jeukens J, Freschi L, Alcalá-Franco B, Facchini M, Boyle B, Molinaro A, Kukavica-Ibrulj I, Tummler B, Levesque RC, Bragonzi A. 2015. Comparative genomics and biological characterization of sequential *Pseudomonas aeruginosa* isolates from persistent airways infection. *BMC Genomics* 16:1105.
10. Bragonzi A, Paroni M, Nonis A, Cramer N, Montanari S, Rejman J, Di Serio C, Doring G, Tummler B. 2009. *Pseudomonas aeruginosa* microevolution during cystic fibrosis lung infection establishes clones with adapted virulence. *American journal of respiratory and critical care medicine* 180:138-45.
11. Hirschhausen N, Block D, Bianconi I, Bragonzi A, Birtel J, Lee JC, Dubbers A, Kuster P, Kahl J, Peters G, Kahl BC. 2013. Extended *Staphylococcus aureus* persistence in cystic fibrosis is associated with bacterial adaptation. *International journal of medical microbiology : IJMM* 303:685-92.
